# Supplementary material for: A novel heptatungstovanadate fragment stabilized by organo-ruthenium group: [HVW7O28Ru(dmso)3]6−
Source: Royal Society of Chemistry journal article supplement (doi:10.1039/c0ce00087f), 2010-01-01
Supplement: c0ce00087f.pdf [file c0ce00087f.pdf]

## Supporting Information

### A Novel Heptatungstovanadate Fragment Stabilized by Organo-Ruthenium Group: $[\text{HVW}_7\text{O}_{28}\text{Ru}(\text{dmsO})_3]^{6-}$

Li-Hua Bi,\* Bin Wang, Guang-Feng Hou, Bao Li, Li-Xin Wu\*

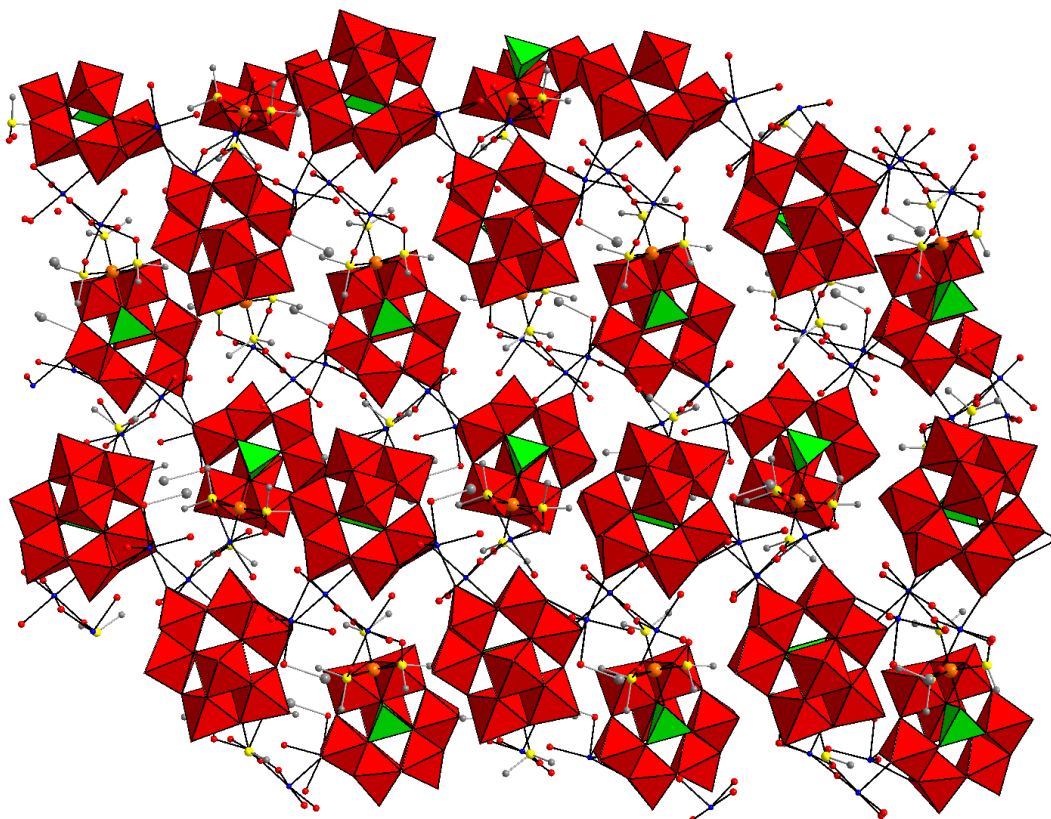

**Figure S1.** Combined polyhedral/ball and stick representation of the 3D structure of compound **1a**. The balls represent ruthenium (orange), sulfur (yellow), oxygen (red), carbon (gray) and hydrogen (cyan). The  $\text{VO}_4$  tetrahedron is green,  $\text{WO}_6$  octahedra are red. Hydrogen atoms are omitted for clarity.

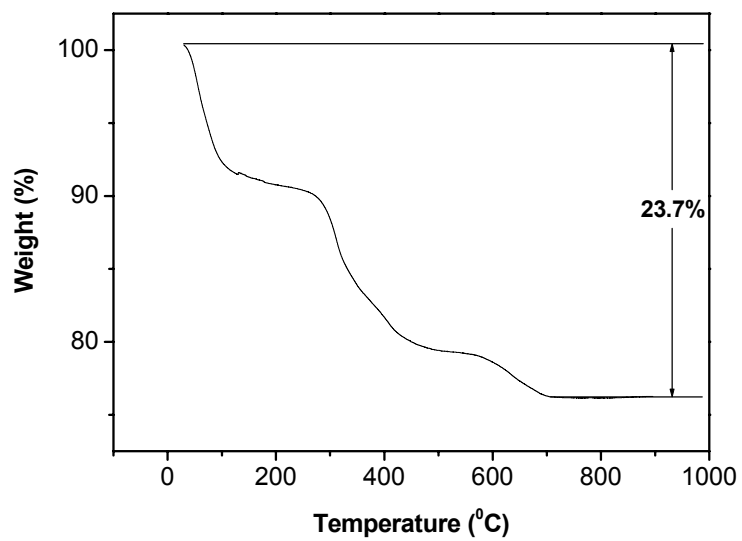

**Figure S2.** TG curve of compound **1a**.

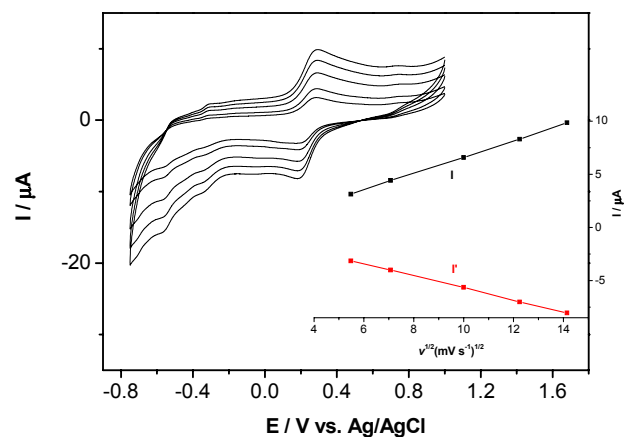

**Figure S3.** CVs of 3.0 mM **1a** in 0.5 M Na<sub>2</sub>SO<sub>4</sub> + H<sub>2</sub>SO<sub>4</sub> at pH 3 at scan rates of 30, 50, 100, 150, and 200 mV s<sup>-1</sup>. The inset shows the relationship of the square roots of the scan rates vs. the oxidation peak currents of I and reduction peak currents of I'.

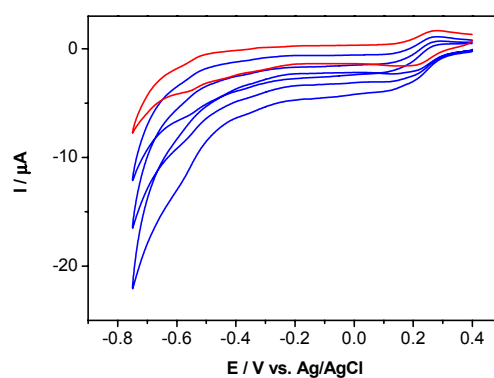

**Figure S4.** CVs of 3.0 mM **1a** in 0.5 M Na<sub>2</sub>SO<sub>4</sub> + H<sub>2</sub>SO<sub>4</sub> (pH 3) solutions before (red curve) and after (blue curves) addition of NO<sub>2</sub><sup>-</sup> at various concentrations: 0.6, 2.3 and 6.1 mM. Scan rate: 10 mV s<sup>-1</sup>.

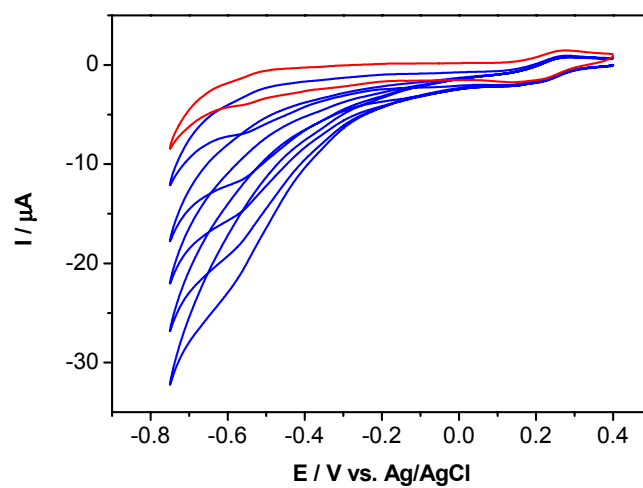

**Figure S5.** CVs of 3.0 mM **1a** in 0.5 M  $\text{Na}_2\text{SO}_4 + \text{H}_2\text{SO}_4$  (pH 3) solutions before (red curve) and after (blue curves) addition of  $\text{H}_2\text{O}_2$  at various concentrations: 0.4, 1.4, 2.9, 5.2 and 8.6 mM. Scan rate:  $10 \text{ mV s}^{-1}$ .
